# Supplementary material for: L-cysteine transporter-PCR to detect hydrogen sulfide-producing Campylobacter fetus
Source: PeerJ. 2019 Nov 5;7:e7820. doi: 10.7717/peerj.7820 (PMC6839519; doi:10.7717/peerj.7820)
Supplement: Supplemental Information 1 [file peerj-07-7820-s001.xlsx]

## Sheet: Hoja1
	C. fetus strain
Assembly features	Cff 08/421	Cff 13/344	Cfvi 06/341
Total length (bp)	1,912,627	1,911,396	1,983,751
Contigs	90	217	89
N50	225,865	22,932	98,237
Largest	306,851	68,881	148,041
Coverage	~366	~48	~74
G+C content	33.2 %	33.2 %	32.9 %
